# Supplementary material for: Chemical Profile and Antioxidant Capacity of Propolis from Tetragonula, Lepidotrigona, Lisotrigona and Homotrigona Stingless Bee Species in Vietnam
Source: MDPI journal article supplement (doi:10.3390/molecules27227834), 2022-11-14
Supplement: s1 [file s1]

## Supplementary material

### Chemical profile and antioxidant capacity of propolis from *Tetragonula*, *Lepidotrigona*, *Lisotrigona* and *Homotrigona* stingless bee species in Vietnam

Milena Popova <sup>1,\*</sup>, Boryana Trusheva <sup>1</sup>, Ralitsa Chimshirova <sup>1</sup>, Daniela Antonova <sup>1</sup>, Kamelia Gechovska <sup>1</sup>, Le Nguyen Thanh <sup>2,3</sup>, Nguyen Thi Phuong Lien <sup>4</sup>, Diep Thi Lan Phuong <sup>5</sup> and Vassya Bankova <sup>1</sup>

<sup>1</sup> Institute of Organic Chemistry with Centre of Phytochemistry, Bulgarian Academy of Sciences, Acad. G. Bonchev, str., bl. 9, 1113 Sofia, Bulgaria

<sup>2</sup> Institute of Marine Biochemistry, Vietnam Academy of Science and Technology, Hanoi 10000, Vietnam

<sup>3</sup> Graduate University of Science and Technology, Vietnam Academy of Science and Technology, Hanoi 10000, Vietnam

<sup>4</sup> Institute of Ecology and Biological Resources, Vietnam Academy of Science and Technology, Hanoi 10000, Vietnam

<sup>5</sup> Faculty of Natural Sciences, Quy Nhon University, Binhdin 55000, Vietnam

\*Correspondence: milena.popova@orgchm.bas.bg



|                       |     |      |      |     |     |      |     |      |      |   |     |      |      |      |   |     |   |     |     |     |     |     |     |     |   |  |
|-----------------------|-----|------|------|-----|-----|------|-----|------|------|---|-----|------|------|------|---|-----|---|-----|-----|-----|-----|-----|-----|-----|---|--|
| Cardanol C13:1        | 0   | 0.5  | 0    | 0   | 0   | 0    | 0   | 0    | 0    | 0 | 0   | 0    | 0    | 0    | 0 | 0   | 0 | 0   | 0   | 0   | 0   | 0   | 0   | 0   | 0 |  |
| Cardanol C15:0        | 0   | 0.4  | 0.1  | 3.5 | 0.3 | 0    | 0   | 0.2  | 0.1  | 0 | 0.1 | 0.1  | 0.3  | Tr.  | 0 | 0   | 0 | 0   | 0   | 0   | 0   | 0   | 0   | 0.1 | 0 |  |
| Cardanol C15:1        | 0   | 1.8  | 0.2  | 3.9 | 0.3 | 0    | Tr. | 0.3  | 0.3  | 0 | 0   | 0    | 0.3  | 0    | 0 | 0   | 0 | 0   | 0.1 | 0   | 0   | 0   | 0   | 0.1 | 0 |  |
| Cardanol C17:0        | 0.1 | 0    | 0.1  | 0   | 0   | 0.3  | 0   | 0.4  | 0    | 0 | 0.1 | 0.1  | 0.7  | 0.1  | 0 | 0   | 0 | 0   | 0   | 0   | 0   | 0   | 0   | 0   | 0 |  |
| Cardanol C17:1        | 0.4 | 0    | 0.9  | 0   | 0   | 0    | 0.1 | 2.4  | 0.4  | 0 | 0.4 | 0.6  | 3.3  | 0.1  | 0 | 0.1 | 0 | 0.1 | 0.2 | 0.1 | 0   | 0.2 | 0   | 0   | 0 |  |
| Cardanol C17:3        | 0   | 0.4  | 0    | 0   | 0   | 0    | 0   | 0.4  | 0    | 0 | 0   | 0    | 0    | 0    | 0 | 0   | 0 | 0   | 0   | 0   | 0   | 0   | 0   | 0   | 0 |  |
| Cardanol C19:1        | 0.4 | 1.1  | 0.8  | 0   | 0   | 0.4  | 0   | 1.8  | 0.6  | 0 | 0.4 | 0.3  | 1.7  | 0    | 0 | 0   | 0 | 0   | 0   | 0   | 0   | 0   | 0   | 0   | 0 |  |
|                       |     |      |      |     |     |      |     |      |      |   |     |      |      |      |   |     |   |     |     |     |     |     |     |     |   |  |
| Resorcinols (cardols) | 7.2 | 26.4 | 34.2 | 1.3 | 1.2 | 17.7 | 1.3 | 34.1 | 20.4 | 0 | 7.8 | 13.5 | 37.1 | 13.2 | 0 | 2.1 | 0 | 4.1 | 0.6 | 0.4 | 0.1 | 0.2 | 2.1 | 0   | 0 |  |
| Resorcinol C15:0      | 0.4 | 1.6  | 1.5  | 0   | Tr. | 0    | 0   | 1.1  | 0.9  | 0 | 0.4 | 0.6  | 1.4  | 1.2  | 0 | 0.2 | 0 | 0.2 | 0   | Tr. | 0   | 0   | 0.1 | 0   | 0 |  |
| Resorcinol C15:1      | 0.2 | 3    | 2.3  | 0   | 0   | 0    | 0   | 1.3  | 1.1  | 0 | 0.4 | 0.4  | 1.3  | 4.4  | 0 | 0.2 | 0 | 0.1 | 0   | 0   | 0   | 0   | 0.1 | 0   | 0 |  |
| Resorcinol C17:0      | 0.5 | 2.6  | 0    | 1.3 | 0.2 | 1    | 0.4 | 2    | 1.5  | 0 | 0.2 | 0.7  | 1.6  | 0    | 0 | 0.1 | 0 | 0.2 | 0   | 0   | Tr. | 0.1 | 0.1 | 0   | 0 |  |
| Resorcinols C17:1     | 4.5 | 12.1 | 22.5 | 0   | 0   | 12.3 | 0   | 22.4 | 10.8 | 0 | 5.7 | 10.7 | 25.7 | 6.8  | 0 | 1.1 | 0 | 2.6 | 0.6 | 0.4 | 0.1 | 0.1 | 1.6 | 7r. | 0 |  |
| Resorcinols C17:3     | 1.6 | 2.6  | 0.8  | 0   | 0   | 0.5  | 0   | 1.1  | 0.6  | 0 | 0   | 0    | 1.8  | 0    | 0 | 0   | 0 | 0.2 | 0   | 0   | 0   | 0   | 0   | 0   | 0 |  |
| Resorcinol C19:0      | 0   | 4.5  | 0.5  | 0   | 0   | 0    | 0   | 0.2  | 0.2  | 0 | 0   | 0    | 0.1  | 0    | 0 | 0   | 0 | 0   | 0   | 0   | 0   | 0   | 0   | 0   | 0 |  |
| Resorcinols C19:1     | 0   | 0    | 6.6  | 0   | 1   | 3.9  | 0.9 | 6    | 5.3  | 0 | 1.1 | 1.1  | 5.2  | 0.8  | 0 | 0.5 | 0 | 0.8 | 0   | 0   | 0   | 0   | 0.2 | 0   | 0 |  |
|                       |     |      |      |     |     |      |     |      |      |   |     |      |      |      |   |     |   |     |     |     |     |     |     |     |   |  |
| Anacardic acids       | 3.7 | 7.1  | 16.2 | 1.6 | 4.3 | 3.5  | 2.6 | 7.3  | 15.4 | 0 | 2.7 | 8.7  | 9    | 0.5  | 0 | 0.4 | 0 | 0.9 | 0.3 | 0.7 | 0.1 | 0.2 | 0.2 | 0.1 | 0 |  |
| Anacardic acid C15:0  | 0.1 | 0    | 3    | 1.6 | 0   | 0    | 0   | 0    | Tr.  | 0 | 0   | 0    | 0    | 0.1  | 0 | Tr. | 0 | 0   | 0   | 0   | Tr. | 0.1 | 0   | Tr. | 0 |  |
| Anacardic acids C15:1 | 0.9 | 0.5  | 1    | 0   | 3.4 | 0.4  | 1.9 | 0    | 5.8  | 0 | 0   | 0.5  | 0    | 0.1  | 0 | 0   | 0 | 0.1 | 0   | 0   | 0   | 0   | 0   | 0   | 0 |  |
| Anacardic acids C17:1 | 0   | 3.6  | 7.1  | 0   | 0.5 | 3.1  | 0.3 | 3.8  | 4.5  | 0 | 1.3 | 4.8  | 4.2  | 0.3  | 0 | 0.4 | 0 | 0   | 0.2 | 0.2 | 0.1 | 0.1 | 0.2 | 0.1 | 0 |  |
| Anacardic acid C17:3  | 0   | 0    | 0.2  | 0   | 0   | 0    | 0   | 0    | 0    | 0 | 0   | 0    | 0    | 0    | 0 | 0   | 0 | 0   | 0   | 0   | 0   | 0   | 0   | 0   | 0 |  |

|                                                                                    |             |             |             |             |             |             |             |             |             |             |             |             |             |           |             |             |             |             |             |           |             |             |             |             |             |
|------------------------------------------------------------------------------------|-------------|-------------|-------------|-------------|-------------|-------------|-------------|-------------|-------------|-------------|-------------|-------------|-------------|-----------|-------------|-------------|-------------|-------------|-------------|-----------|-------------|-------------|-------------|-------------|-------------|
| Anacardic acid C19:0                                                               | 0           | 0           | 0           | 0           | 0           | 0           | 0           | 0.2         | 0           | 0           | 0.7         | 0.2         | 2.4         | 0         | 0           | 0           | 0           | 0.4         | 0.1         | 0         | 0           | 0           | 0           | 0           | 0           |
| Anacardic acid C19:1                                                               | 2.7         | 3           | 4.9         | 0           | 0.4         | 0           | 0.4         | 3.3         | 5.1         | 0           | 0.7         | 3.2         | 2.4         | 0         | 0           | 0           | 0           | 0.4         | 0           | 0.5       | 0           | 0           | 0           | 0           | 0           |
| <b>Triterpenes</b>                                                                 | <b>35.6</b> | <b>22.8</b> | <b>28.9</b> | <b>33.0</b> | <b>28.9</b> | <b>32.2</b> | <b>28.9</b> | <b>26.1</b> | <b>33.1</b> | <b>14.3</b> | <b>31.6</b> | <b>31.9</b> | <b>18.4</b> | <b>22</b> | <b>50.8</b> | <b>39.3</b> | <b>45.6</b> | <b>33.6</b> | <b>28.8</b> | <b>24</b> | <b>28.2</b> | <b>20.5</b> | <b>31.6</b> | <b>16.4</b> | <b>56.2</b> |
| (13 <i>E</i> ,17 <i>E</i> )-Polydopa-7,13,17,21-tetraen-3 $\beta$ -ol <sup>b</sup> | 0           | 0           | 0.1         | 0           | 0.8         | 0           | 0           | 0           | 0           | 11.2        | 0           | 0           | 0           | 0         | 0           | 0.3         | 0           | 0           | 0           | 0         | 0           | 0.6         | 0           | 0           | 0           |
| Lanosterol <sup>c</sup>                                                            | 1.8         | 2           | 0.2         | 0           | 0           | 0.5         | 0.6         | 0.3         | 0.9         | 0           | 0           | 0           | 0.4         | 2.9       | 0.4         | 0.8         | 0           | 0.4         | 0.2         | 0         | 0           | 0           | 0           | 0           | 0           |
| Lanosterol (3- <i>epi</i> ) <sup>c</sup>                                           | 3           | 2.7         | 0           | 0           | 0           | 0           | 0           | 0.4         | 0.2         | 0           | 0           | 0.6         | 0           | 3.1       | 0           | 0.3         | 0           | 0.6         | 0           | 0         | 0           | 0           | 1           | 0           | 0           |
| $\alpha$ -Amyrine                                                                  | 3.3         | 0           | 2.7         | 0.8         | 1.5         | 2.8         | 2.9         | 1.7         | 3.2         | 0.9         | 2.8         | 2.5         | 2.1         | 2.8       | 6.8         | 4.5         | 1.2         | 7.4         | 1.1         | 0         | 5.6         | 3.9         | 0           | 2           | 0.7         |
| $\beta$ -Amyrine                                                                   | 5.2         | 2.2         | 2.2         | 0.9         | 1.0         | 3.2         | 3.8         | 1.4         | 2.7         | 0.4         | 4.4         | 3.0         | 2.4         | 4.3       | 9.0         | 9.5         | 2.1         | 3.3         | 0           | 5.1       | 8.7         | 2.6         | 7.2         | 1.4         | 0.5         |
| $\alpha$ -Amyrenone                                                                | 2.2         | 0           | 0           | 0           | 0           | 0.7         | 0.9         | 0.5         | 0           | 0           | 3.0         | 0           | 0           | 0         | 0           | 1.7         | 0           | 0           | 2.1         | 4.5       | 3.9         | 3.4         | 3.1         | 0           | 0           |
| $\beta$ -Amyrenone                                                                 | 3.1         | 0           | 0           | 0           | 0           | 0.7         | 1.2         | 0.6         | 0.1         | 0           | 1.1         | 0           | 0           | 0         | 0           | 1           | 0           | 0           | 0           | 2.8       | 2.9         | 0           | 1.6         | 0.9         | 0           |
| Ursolic acid                                                                       | 0           | 0           | 0           | 1           | 3.2         | 2.1         | 2.8         | 0           | 0.8         | 0           | 0           | 0           | 0           | 0         | 4.9         | 0           | 0           | 0           | 0           | 0         | 0           | 0           | 0           | 0           | 0           |
| Oleanolic acid                                                                     | 0           | 0           | 0           | 0           | 0           | 0           | 0.4         | 0           | 0           | 0           | 0           | 0           | 0           | 0         | 1.9         | 0           | 0           | 0           | 0           | 0         | 0           | 0           | 0           | 0           | 0.1         |
| Ursonic acid                                                                       | 0           | 0           | 0           | 2.7         | 2.7         | 2.9         | 2.5         | 0           | 0           | 0           | 0           | 0           | 0           | 0         | 4.9         | 0           | 1           | 1.9         | 0           | 0         | 0           | 0           | 0           | 2.7         | 3.8         |
| Moronic acid                                                                       | 0           | 0           | 0           | 3.5         | 2.4         | 0.9         | 1.1         | 0           | 0           | 0           | 0           | 0           | 0           | 0         | 0           | 0           | 0           | 0           | 0           | 0         | 0           | 0           | 0           | 0           | 0           |
| Oleanonic acid                                                                     | 0.1         | 0           | 0           | 0           | 0           | 0           | 0.2         | 0           | 0           | 0           | 0           | 0           | 0           | 0         | 1.9         | 1           | 2.6         | 1.3         | 0           | 0         | 0           | 0           | 0           | 1.8         | 1.9         |
| Lantanolic acid <sup>b</sup>                                                       | 0           | 0           | 1.2         | 11.5        | 3.4         | 0           | 2.8         | 0           | 1.5         | 0           | 0           | 0           | 0           | 0         | 0           | 0           | 0           | 0           | 0           | 0         | 0           | 0           | 0           | 0           | 0           |
| Uvaol                                                                              | 0           | 0           | 0           | 0           | 0           | 0           | 0           | 0           | 0           | 0           | 0           | 0           | 0           | 0         | 1.5         | 0           | 0.4         | 0           | 0           | 0         | 0           | 0           | 0           | 0           | 1.1         |
| Erythrodiol                                                                        | 0           | 0           | 0           | 0           | 0           | 0           | 0           | 0           | 0           | 0           | 0           | 0           | 0           | 0         | 0.2         | 0           | 0.8         | 0           | 0           | 0         | 0           | 0           | 0           | 0           | 0.6         |
| Ursolic aldehyde                                                                   | 0           | 0           | 0           | 0.1         | 0           | 0           | 0           | 0           | 0           | 0           | 0           | 0           | 0           | 0         | 3.0         | 1.1         | 3.2         | 0           | 0           | 0         | 0           | 0           | 0           | 0           | 2.2         |
| Oleanolic aldehyde                                                                 | 0           | 0           | 0           | 0           | 0           | 0           | 0           | 0           | 0           | 0           | 0           | 0           | 0           | 0         | 4.6         | 0           | 8.8         | 0           | 0           | 0         | 0           | 0           | 0           | 0           | 3.4         |

[illegible]

|                                                 |          |          |            |             |             |            |            |          |            |            |          |          |          |             |          |            |          |             |             |            |            |             |          |          |          |
|-------------------------------------------------|----------|----------|------------|-------------|-------------|------------|------------|----------|------------|------------|----------|----------|----------|-------------|----------|------------|----------|-------------|-------------|------------|------------|-------------|----------|----------|----------|
| Triterpene hydroxy acid (M <sup>+</sup> =598)   | 2.4      | 0        | 0          | 1.9         | 1.4         | 1.7        | 0          | 0        | 0          | 0          | 0        | 0        | 0        | 0           | 0        | 0          | 0        | 0           | 0           | 0          | 0          | 0           | 0        | 0        |          |
| Triterpenic acid (M <sup>+</sup> =616)          | 0        | 0        | 0          | 0.4         | 3.0         | 0          | 0          | 0        | 0          | 0          | 0        | 0        | 0        | 0           | 0        | 0          | 0        | 0.1         | 0           | 0          | 0          | 0.1         | 0        | 0        | 0        |
| <b>Xanthones</b>                                | <b>0</b> | <b>0</b> | <b>4.8</b> | <b>28.9</b> | <b>23.3</b> | <b>1.5</b> | <b>6.5</b> | <b>0</b> | <b>2.5</b> | <b>47</b>  | <b>0</b> | <b>0</b> | <b>0</b> | <b>20.5</b> | <b>0</b> | <b>2.8</b> | <b>0</b> | <b>0</b>    | <b>0</b>    | <b>0</b>   | <b>8.1</b> | <b>38.6</b> | <b>0</b> | <b>0</b> | <b>0</b> |
| 4-Geranyl-1,3,5-trihydroxyxanthone <sup>b</sup> | 0        | 0        | 0.7        | 4.2         | 2.7         | 0          | 0.6        | 0        | 0          | 0          | 0        | 0        | 0        | 0           | 0        | 0          | 0        | 0           | 0           | 0          | 0          | 0           | 0        | 0        | 0        |
| α-Mangostin <sup>b</sup>                        | 0        | 0        | 1.4        | 4           | 2.7         | 0.9        | 1.4        | 0        | 0.5        | 7.6        | 0        | 0        | 0        | 4.6         | 0        | 0.5        | 0        | 0           | 0           | 0          | 0          | 6.3         | 0        | 0        | 0        |
| Dihydromangostanine <sup>b</sup>                | 0        | 0        | 0.8        | 0           | 4.1         | 0          | 1.7        | 0        | 1          | 0.3        | 0        | 0        | 0        | 0           | 0        | 0          | 0        | 0           | 0           | 0          | 3.0        | 0           | 0        | 0        | 0        |
| Cochinchinone A <sup>b</sup>                    | 0        | 0        | 1.1        | 15.8        | 7.1         | 0.6        | 1.7        | 0        | 1          | 36.3       | 0        | 0        | 0        | 4.2         | 0        | 0.5        | 0        | 0           | 0           | 0          | 4.1        | 20.7        | 0        | 0        | 0        |
| Cratoxylumxanthone B <sup>b</sup>               | 0        | 0        | 0          | 0           | 0           | 0          | 0          | 0        | 0          | 0.2        | 0        | 0        | 0        | 0.3         | 0        | 0          | 0        | 0           | 0           | 0          | 0          | 4.7         | 0        | 0        | 0        |
| Cochinchinone K <sup>b</sup>                    | 0        | 0        | 0.8        | 3.5         | 3.6         | 0          | 0.7        | 0        | 0          | 2.6        | 0        | 0        | 0        | 1.7         | 0        | 0          | 0        | 0           | 0           | 0          | 1.0        | 6.9         | 0        | 0        | 0        |
| Xanthone (M <sup>+</sup> =536)                  | 0        | 0        | 0          | 0           | 0           | 0          | 0          | 0        | 0          | 0          | 0        | 0        | 0        | 9.7         | 0        | 1.8        | 0        | 0           | 0           | 0          | 0          | 0           | 0        | 0        | 0        |
| Xanthone (M <sup>+</sup> =554)                  | 0        | 0        | 0          | 1.4         | 3.1         | 0          | 0.4        | 0        | 0          | 0          | 0        | 0        | 0        | 0           | 0        | 0          | 0        | 0           | 0           | 0          | 0          | 0           | 0        | 0        | 0        |
| <b>Tocotrienols</b>                             | <b>0</b> | <b>0</b> | <b>0</b>   | <b>0.2</b>  | <b>0.3</b>  | <b>0</b>   | <b>0</b>   | <b>0</b> | <b>0</b>   | <b>1.8</b> | <b>0</b> | <b>0</b> | <b>0</b> | <b>0.8</b>  | <b>0</b> | <b>0.1</b> | <b>0</b> | <b>0</b>    | <b>0</b>    | <b>0</b>   | <b>1.1</b> | <b>0</b>    | <b>0</b> | <b>0</b> | <b>0</b> |
| d-Tocotrienol                                   | 0        | 0        | Tr.        | 0.2         | 0.2         | 0          | Tr.        | 0        | 0          | 0.9        | 0        | 0        | 0        | 0.6         | 0        | 0.1        | 0        | 0           | 0           | 0          | Tr.        | 0.8         | 0        | 0        | 0        |
| β/γ-Tocotrienol                                 | 0        | 0        | 0          | 0           | 0.1         | 0          | 0          | 0        | 0          | 0.9        | 0        | 0        | 0        | 0.2         | 0        | 0          | 0        | 0           | 0           | 0          | 0          | 0.3         | 0        | 0        | 0        |
| <b>Unknowns</b>                                 | <b>0</b> | <b>0</b> | <b>0</b>   | <b>0</b>    | <b>0</b>    | <b>0</b>   | <b>0</b>   | <b>0</b> | <b>0</b>   | <b>0</b>   | <b>0</b> | <b>0</b> | <b>0</b> | <b>0</b>    | <b>0</b> | <b>0</b>   | <b>0</b> | <b>11.2</b> | <b>19.7</b> | <b>6.0</b> | <b>0</b>   | <b>0</b>    | <b>0</b> | <b>0</b> | <b>0</b> |
| Unknown 1                                       | 0        | 0        | 0          | 0           | 0           | 0          | 0          | 0        | 0          | 0          | 0        | 0        | 0        | 0           | 0        | 0          | 0        | 5.7         | 8.1         | 0          | 0          | 0           | 0        | 0        | 0        |
| Unknown 2                                       | 0        | 0        | 0          | 0           | 0           | 0          | 0          | 0        | 0          | 0          | 0        | 0        | 0        | 0           | 0        | 0          | 0        | 2.2         | 5.6         | 0          | 0          | 0           | 0        | 0        | 0        |
| Unknown 3                                       | 0        | 0        | 0          | 0           | 0           | 0          | 0          | 0        | 0          | 0          | 0        | 0        | 0        | 0           | 0        | 0          | 0        | 1.5         | 5.7         | 2.4        | 0          | 0           | 0        | 0        | 0        |

|           |   |   |   |   |   |   |   |   |   |   |   |   |   |   |   |   |   |     |     |     |   |   |   |   |   |
|-----------|---|---|---|---|---|---|---|---|---|---|---|---|---|---|---|---|---|-----|-----|-----|---|---|---|---|---|
| Unknown 4 | 0 | 0 | 0 | 0 | 0 | 0 | 0 | 0 | 0 | 0 | 0 | 0 | 0 | 0 | 0 | 0 | 0 | 1.8 | 5.9 | 3.6 | 0 | 0 | 0 | 0 | 0 |
|-----------|---|---|---|---|---|---|---|---|---|---|---|---|---|---|---|---|---|-----|-----|-----|---|---|---|---|---|

---

<sup>a</sup> The detailed information (bee species, geographical location and time of collection) for the propolis samples from V-1 to V-25 is presented in Table 1; <sup>b</sup> Identified by reference compounds; <sup>c</sup> Intercheangable compounds. *T.i.* – *Tetragonula iridipennis*; *L.v.*- *Lepidotrigona ventralis*; *T.l.* – *Tetragonula laeviceps*; *L.c.* – *Lisotrigona carpenteri*; *H.a.* – *Homotrigona apicalis*; *L.t.* – *Lepidotrigona terminata*. Tr. – traces (< 0.05 %TIC).

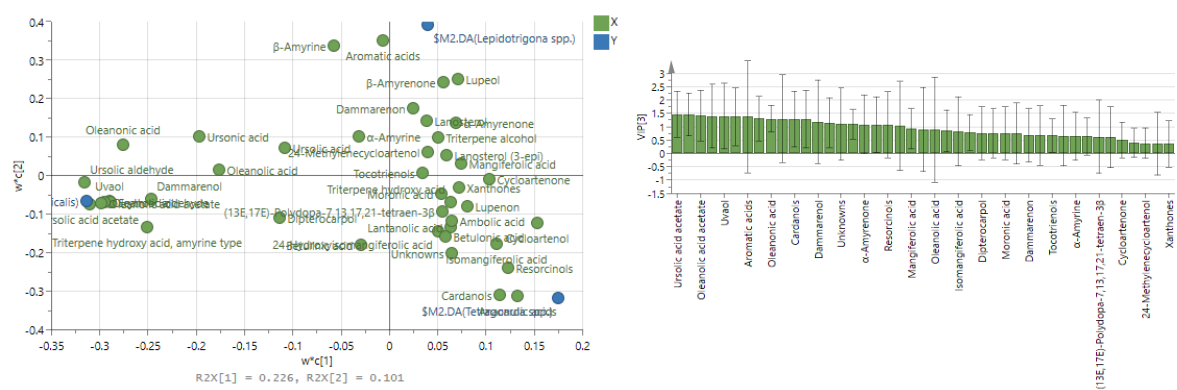

**Figure S1.** Loading plot and variable's contribution in the projection (VIP) of PLS-DA model for classification of 24 propolis samples based on 43 variables in accordance with the three stingless bee genera *Tetragonula*, *Lepidotrigona* and *Homotrigona*.

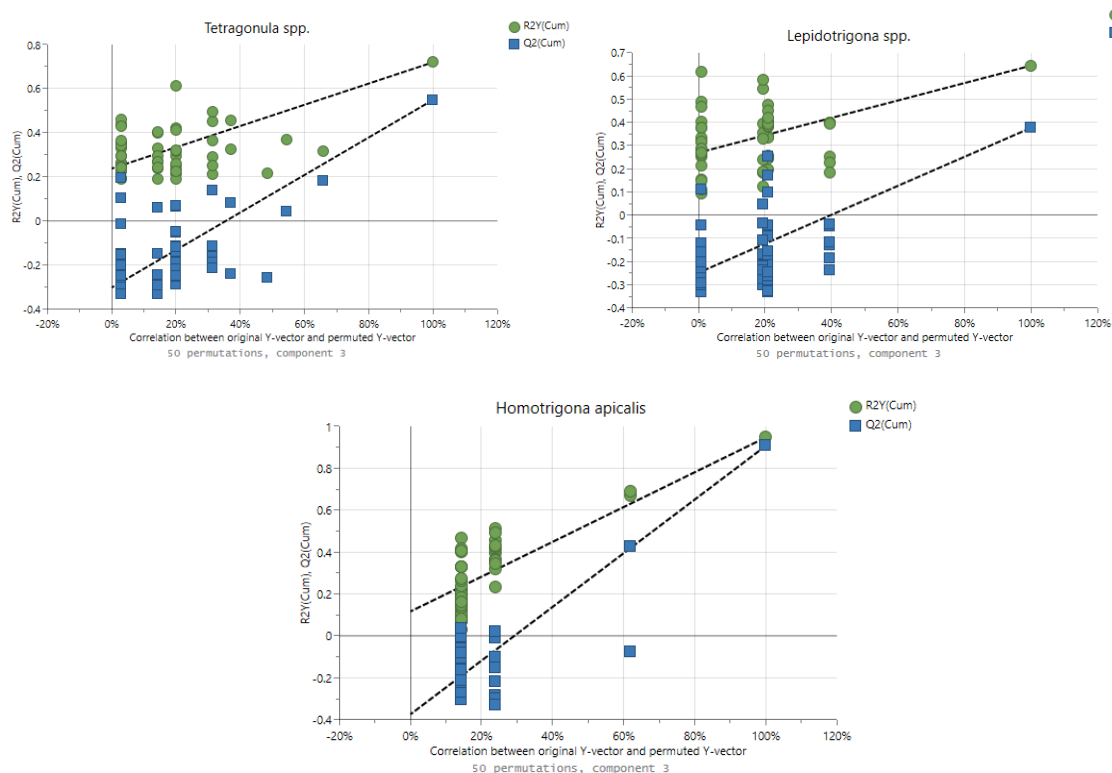

**Figure S2.** Permutation tests for the three predefined classes in PLS-DA model for classification of 24 propolis samples based on 14 variables.



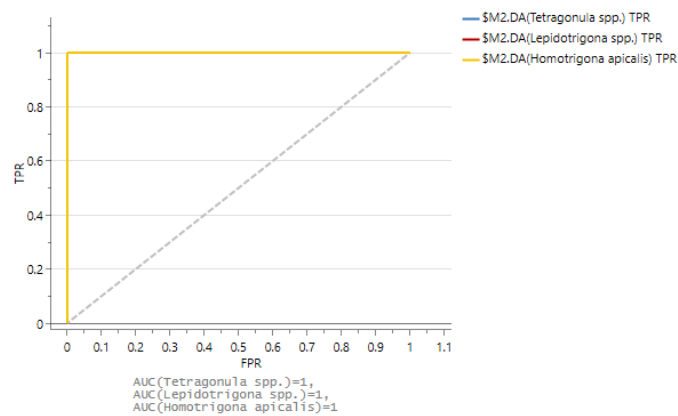

**Figure S3.** ROC analysis for *Tetragonula*, *Lepidotrigona* and *Homotrigona* stingless bee propolis.

**Table S2.** Misclassification table for PLS-DA model for classification of 24 propolis samples based on 14 variables propolis in accordance with the three genera *Tetragonula*, *Lepidotrigona* and *Homotrigona*.

|                                    | Members | Correct | <i>Tetragonula</i><br>spp. | <i>Lepidotrigona</i><br>spp. | <i>Homotrigona</i><br><i>apicalis</i> |
|------------------------------------|---------|---------|----------------------------|------------------------------|---------------------------------------|
| <i>Tetragonula</i> spp.            | 14      | 100%    | 14                         | 0                            | 0                                     |
| <i>Lepidotrigona</i> spp.          | 7       | 85.71%  | 1                          | 6                            | 0                                     |
| <i>Homotrigona</i> <i>apicalis</i> | 3       | 100%    | 0                          | 0                            | 3                                     |
| Total                              | 24      | 95.83%  | 15                         | 6                            | 3                                     |
| Fisher's prob.                     | 6.4e-08 |         |                            |                              |                                       |

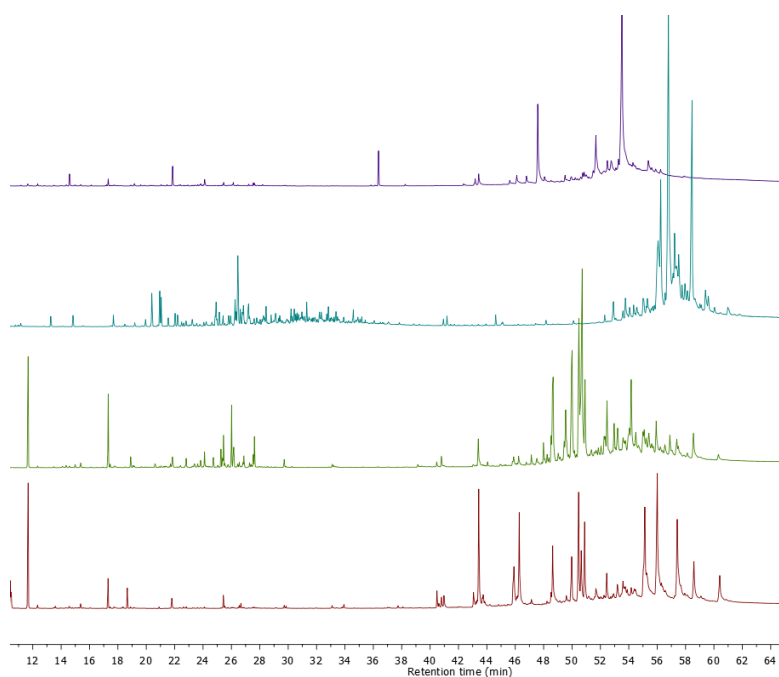

**Figure S4.** GC chromatograms of selected samples. From bottom to top: propolis from *Tetragonula iridipennis* (V-12), *Lepidotrigona terminata* (V-16), *Homotrigona apicalis* (V-17) and *Lisotrigona carpenteri* (V-10).

**Table S3.** Pearson correlation ( $r$ ) between groups of phenolic constituents and DPPH and FRAP values.

| Correlation among variables                                             | DPPH    | FRAP    |
|-------------------------------------------------------------------------|---------|---------|
| Phenolic acids                                                          | 0.623** | 0.786** |
| Cardanols                                                               | 0.032   | -0.064  |
| Resorcinols                                                             | -0.287  | -0.313  |
| Anacardic acids                                                         | -0.175  | -0.231  |
| Xanthoness                                                              | 0.538** | 0.302   |
| Phenolic acids + cardanols + resorcinols + anacardic acids + xanthoness | 0.220   | 0.315   |
| Phenolic acids + xanthoness                                             | 0.624** | 0.417*  |

\*Correlation is significant at the 0.05 level (two-tailed). \*\* Correlation is significant at the 0.01 level (two-tailed).
